# Supplementary material
Source: PubMed Central journal article supplement (PMC5123557)

Supplementary Figure e-1

A. The examiner's left eye was perceived to be larger than the right eye, with elongation of the nose. B. The patient's fingers were perceived to be disproportionate in size. C. The examiner's upper body was perceived to be disproportionately larger than the lower half of the body

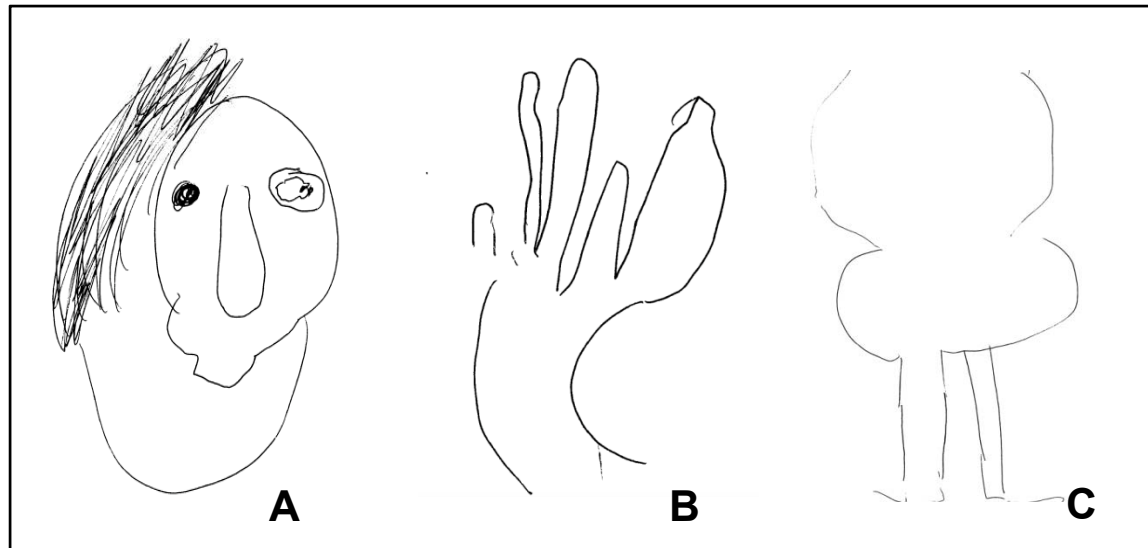

Supplement: supp_WNL.0000000000003357_Supplementary_Figure_e-1.pdf [file supp_WNL.0000000000003357_Supplementary_Figure_e-1.pdf]
