# Supplementary material
Source: PubMed Central journal article supplement (PMC5123557)

Supplementary Figure e-2.

EEG illustrating a background of continuous, 1-2Hz, generalized periodic epileptiform discharges with amplitude predominance over the posterior leads (P3/P4/O1/O2).

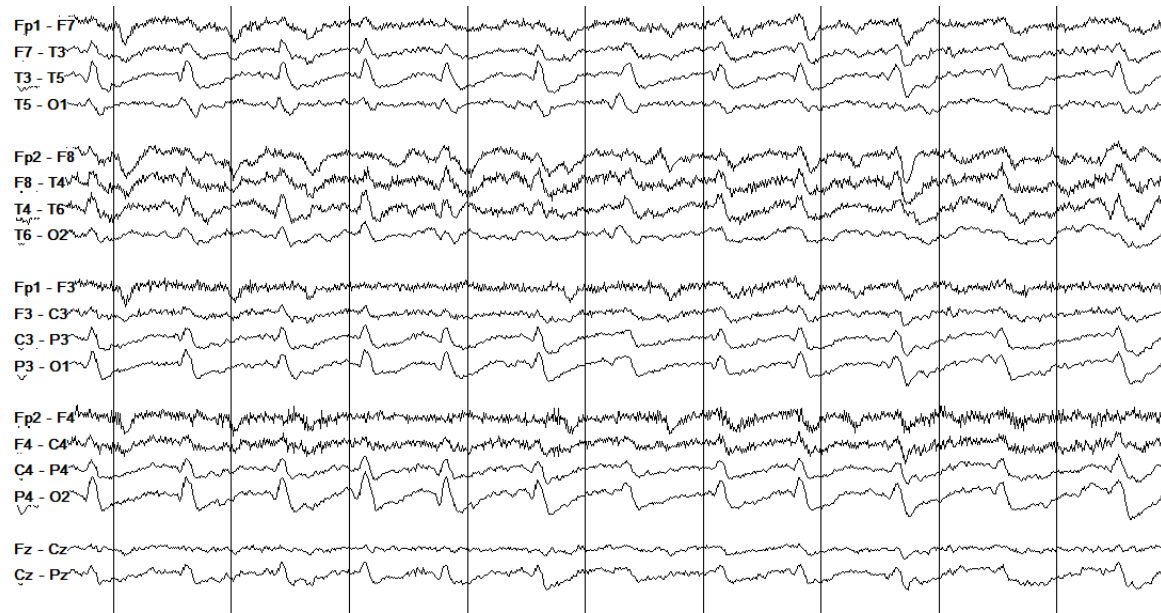

Supplement: supp_WNL.0000000000003357_Supplementary_Figure_e-2.pdf [file supp_WNL.0000000000003357_Supplementary_Figure_e-2.pdf]
